# Supplementary material for: A Survey of Spontaneous Antibiotic-Resistant Mutants of the Halophilic, Thermophilic Bacterium Rhodothermus marinus
Source: MDPI journal article supplement (doi:10.3390/antibiotics10111384), 2021-11-11
Supplement: s1 [file s1]

## Supplemental Materials

**Figure S1.** Generation of *rplD* erythromycin-resistance mutations. Pairwise alignment of wild-type *R. marinus rplD* gene and uL4 protein sequences with the corresponding sequences from each of the three erythromycin-resistant mutants SOP57 (*rplD1*), SOP25 (*rplD2*), and SOP16 (*rplD3*). The sequence deleted and mutated in *rplD1* is highlighted in grey, as are the direct repeat sequences involved in homologous recombination to produce the *rplD2* and *rplD3* alleles. Sequences were aligned using Clustal Omega (<https://www.ebi.ac.uk/Tools/msa/clustalo/>) [54].

WT

```
AAGAACCGGGCCGAAAACGCCCACAGCACCCGCAAGCTGTACCGCCAGAAAGGTACGGGTTACGCCCGGGCCGGCGATGCCAAGTCGCCCATTCTCGGGGGGGTGGTACGGCCACGGG
K N R A E N A H S T R K L Y R Q K G T G Y A R A G D A K S P I R R G G G T A H G
50 58 59 60 70 80
```

*rplD1* (K58N,ΔA50-R69)

```
AAGAACCGGGCCGAAAACGCCCACAGCACCCGCAACCGCCAGAAAGGTACGGGTTACGCCCGGGCCGGCGATGCCAAGTCGCCCATTCTCGGGGGGGTGGTACGGCCACGGG
K N R A E N A H S T R N R Q K G T G Y A R A G D A K S P I R R G G G T A H G
50 K58N,ΔL59-Y60 70 80
```

WT

```
AAGAACCGGGCCGAAAACGCCCACAGCACCCGCAAGCTGTACCGCCAGAAAGGTACGGGTTACGCCCGGGCCGGCGATGCCAAGTCGCCCATTCTCGGGGGGGTGGTACGGCCACGGG
K N R A E N A H S T R K L Y R Q K G T G Y A R A G D A K S P I R R G G G T A H G
50 60 70 80
```

*rplD2* (ΔA50-R69)

```
AAGAACCGGGCCGGCGATGCCAAGTCGCCCATTCTCGGGGGGGTGGTACGGCCACGGG
K N R A G D A K S P I R R G G G T A H G
50 71 80
```

WT

```
AAGAACCGGGCCGAAAACGCCCACAGCACCCGCAAGCTGTACCGCCAGAAAGGTACGGGTTACGCCCGGGCCGGCGATGCCAAGTCGCCCATTCTCGGGGGGGTGGTACGGCCACGGG
K N R A E N A H S T R K L Y R Q K G T G Y A R A G D A K S P I R R G G G T A H G
50 60 64 70 80 84
```

*rplD3* (ΔT65-G82)

```
AAGAACCGGGCCGAAAACGCCCACAGCACCCGCAAGCTGTACCGCCAGAAAGGTACGGCCACGGG
K N R A E N A H S T R K L Y R Q K G T A H G
50 60 64 84
```

**Table S1.** Oligonucleotides used in this study. Locus tags and genome coordinates are taken from the accession number NC\_013501.1 [17].

| Name        | Sequence (5'-3')           | Gene (Gene Product)                 | Locus Tag    | Genome Coordinates |
|-------------|----------------------------|-------------------------------------|--------------|--------------------|
| Rma_rnA_f1  | GCGAATCTGGCCGGAACCGAACAGGC | <i>rrsA</i> (16S rRNA)              | RMAR_RS00885 | 186847-186872      |
| Rma_rnA_f2  | CATGCGGCTGAAAGGAACCCGGCCG  | <i>rrsA</i> (16S rRNA)              | RMAR_RS00885 | 186751-186775      |
| Rma_rnA_f3  | CGACGGTTGATGTAAATTGCCGGTCC | <i>rrsA</i> (16S rRNA)              | RMAR_RS00885 | 187033-187058      |
| Rma_rnA_f4  | GTAAACCGAGCAAAGCAAGGAG     | <i>rrlA</i> (23S rRNA)              | RMAR_RS00900 | 189144-189165      |
| Rma_rnA_f5  | TAGCCCTTAATTATAAGGTATCGG   | <i>pyrR</i> (PyrR)                  | RMAR_RS00870 | 185941-185964      |
| Rma_rnA_f6  | GGAGCATGTGGCTTAATTCGATGC   | <i>rrsA</i> (16S rRNA)              | RMAR_RS00885 | 188156-188179      |
| Rma_rnA_f7  | GACGCGAAACCGGGTGAG         | <i>rrlA</i> (23S rRNA)              | RMAR_RS00900 | 189932-189949      |
| Rma_rnA_f8  | GGTCCTAAGGTAGCGAAATTCC     | <i>rrlA</i> (23S rRNA)              | RMAR_RS00900 | 191195-191216      |
| Rma_rnA_r1  | GAACGCACAAGGCGCGCATCTATCC  | <i>rrfA</i> (5S rRNA)               | RMAR_RS00905 | 192478-192503      |
| Rma_rnA_r2  | TCGTGGAGCAGCGTTTCGCCATAGG  | <i>purL</i> (PRFG synthase)         | RMAR_RO00910 | 192532-192557      |
| Rma_rnA_r3  | TCGACGATCCAGCCGATTCTTCGTC  | <i>purL</i> (PRFG synthase)         | RMAR_RO00910 | 192601-192626      |
| Rma_rnA_r4  | CTGTCGTTCCGCGAGTAGGCGGAG   | <i>rrsA</i> (16S rRNA)              | RMAR_RS00885 | 188770-188793      |
| Rma_rnA_r5  | CCGAAGCTTCGGCGCCAGGCTTG    | <i>rrlA</i> (23S rRNA)              | RMAR_RS00900 | 190406-190428      |
| Rma_rnA_r6  | GCACAACCTGGTACACTAGAGG     | <i>rrlA</i> (23S rRNA)              | RMAR_RS00900 | 191954-191974      |
| Rma_rnA_r7  | TTGCACTCTACGCACGATTACC     | <i>rrlA</i> (23S rRNA)              | RMAR_RS00900 | 191581-191602      |
| Rma_rnA_r8  | CCTGATATCTACGCATTTACC      | <i>rrsA</i> (16S rRNA)              | RMAR_RS00885 | 187903-187924      |
| Rma_rplD_f1 | CTGTAAACGGCATTGTCTGAATTG   | <i>rplD</i> (r-protein uL4)         | RMAR_RS04205 | 965925-965947      |
| Rma_rplD_r1 | CGTCCATCTGCTGCGAGAGC       | <i>rplD</i> (r-protein uL4)         | RMAR_RS04205 | 966705-966724      |
| Rma_rplV_f1 | GGTCTATATCACGGAGAACATGGTC  | <i>rplV</i> (r-protein uL22)        | RMAR_RS04225 | 968074-968098      |
| Rma_rplV_r1 | CGCCCAGGCGAAATCCTATCGG     | <i>rplV</i> (r-protein uL22)        | RMAR_RS04225 | 968617-968638      |
| Rma_rplK_f1 | ACAGAAGCATTCGAGAGGCGC      | <i>rplK</i> (r-protein uL11)        | RMAR_RS05505 | 1275101-1275121    |
| Rma_rplK_r1 | TCTCAAGCGCCTGGCGATAGCG     | <i>rplK</i> (r-protein uL11)        | RMAR_RS05505 | 1275704-1275725    |
| Rma_rpoB_f1 | CTCTATCCAATTTGCAGGCG       | <i>rpoB</i> (RNAP $\beta$ -subunit) | RMAR_RS05525 | 1277636-1277655    |
| Rma_rpoB_f2 | CGCATGGCCCGTACCATC         | <i>rpoB</i> (RNAP $\beta$ -subunit) | RMAR_RS05525 | 1279042-1279059    |
| Rma_rpoB_r1 | TCTTCCCTTGCGGCATAGCG       | <i>rpoB</i> (RNAP $\beta$ -subunit) | RMAR_RS05525 | 1281600-1281619    |
| Rma_rpoB_r2 | CTTGACGAACTCGTTGAGG        | <i>rpoB</i> (RNAP $\beta$ -subunit) | RMAR_RS05525 | 1279521-1279539    |

**Table S2.** Antibiotic zones of inhibition. Discs were 6 mm in diameter.

| Antibiotic Class (Target)         | Antibiotic <sup>1</sup> | Zone (mm) |
|-----------------------------------|-------------------------|-----------|
| 14-atom macrolide (ribosome, 50S) | erythromycin            | 41        |
|                                   | oleandomycin            | 26        |
|                                   | roxithromycin           | 46        |
|                                   | clarithromycin          | 53        |
| 15-atom macrolide (ribosome, 50S) | azithromycin            | 31        |
| 16-atom macrolide (ribosome, 50S) | spiramycin              | 35        |
|                                   | chalconomycin           | 18        |
|                                   | tylosin                 | 59        |
|                                   | carbomycin              | 53        |
| lincosamide (ribosome, 50S)       | lincomycin              | 64        |
|                                   | clindamycin             | 71        |
| streptogramin B (ribosome, 50S)   | pristinamycin           | 51        |
| pleuromutilin (ribosome, 50S)     | tiamulin                | 44        |
| amphenicol (ribosome, 50S)        | chloramphenicol         | 19        |
| thiopeptide (ribosome, 50S)       | thiostrepton            | 43        |
| elfamycin (EF-Tu)                 | kirromycin              | 38        |
| fusidane (EF-G)                   | fusidic acid            | 36        |
| rifamycin (RNA polymerase)        | rifampicin              | 43        |
| fluoroquinolone (DNA gyrase)      | ofloxacin               | 41        |
|                                   | ciprofloxacin           | 46        |

<sup>1</sup> Antibiotics not listed produced no zones of inhibition.

## References

17. Nolan, M.; Tindall, B.J.; Pomrenke, H.; Lapidus, A.; Copeland, A.; Glavina Del Rio T.; Lucas, S.; Chen, F.; Tice, H.; Cheng, J.F.; Saunders, E.; Han, C.; Bruce, D.; Goodwin, L.; Chain, P.; Pitluck, S.; Ovchinnikova, G.; Pati, A.; Ivanova, N.; Mavromatis, K.; Chen, A.; Palaniappan, K.; Land, M.; Hauser, L.; Chang, Y.J.; Jeffries, C.D.; Brettin, T.; Göker, M.; Bristow, J.; Eisen, J.A.; Markowitz, V.; Hugenholtz, P.; Kyrpides, N.C.; Klenk, H.P.; Detter, J.C. 2009. Complete genome sequence of *Rhodothermus marinus* type strain (R-10). *Stand. Genomic Sci.* **2009**, *1*, 283-290.
54. Madeira F.; Park, Y.M.; Lee, J.; Buso, N.; Gur, T.; Madhusoodanan, N.; Basutkar, P.; Tivey, A.R.N.; Potter, S.C.; Finn, R.D.; Lopez, R. The EMBL-EBI search and sequence analysis tools APIs in 2019. *Nucleic Acids Res.* **2019**, *47*, W636-W641.
